# Supplementary material for: Improving the user experience of patient versions of clinical guidelines: user testing of a Scottish Intercollegiate Guideline Network (SIGN) patient version
Source: PubMed Central journal article supplement (PMC4736267; doi:10.1186/s12913-016-1287-8), 2016-02-02

# STROKE RISK

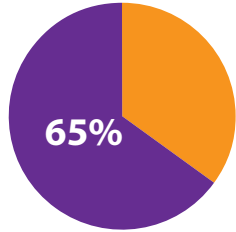

**65% PEOPLE**  
WILL NOT HAVE A  
STROKE WHETHER  
THEY TAKE WARFARIN  
OR NOT

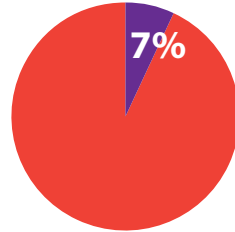

**7% PEOPLE**  
WILL BE SAVED FROM  
HAVING A STROKE  
BY TAKING ASPIRIN

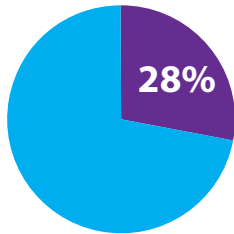

**28% PEOPLE**  
WILL STILL HAVE A  
STROKE EVEN THOUGH  
THEY TOOK ASPIRIN

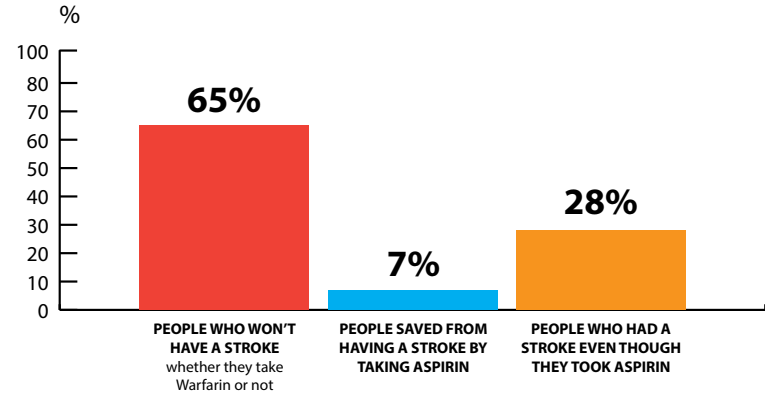

Supplement: 12913_2016_1287_MOESM3_ESM.pdf [file 12913_2016_1287_MOESM3_ESM.pdf]
